# Supplementary material for: The Advantages of a Tapered Whisker
Source: PLoS One. 2010 Jan 20;5(1):e8806. doi: 10.1371/journal.pone.0008806 (PMC2808387; doi:10.1371/journal.pone.0008806)
Supplement: File S1 — Detailed calculation of the deflection of an elastic beam. (0.26 MB PDF) [file pone.0008806.s001.pdf]

## The Advantages of a Tapered Whisker

C. M. Williams & E. M. Kramer

### Supplemental File 1

#### Beam theory equations

We follow standard treatments of elastic beam theory [1-3]. Consider an elastic beam deflected by a frictionless pin (Fig. A1). The midline of the beam is parameterized by the arclength  $s$ , with  $s = 0$  at the origin of the  $x$ - $y$  plane. The beam is deflected by a frictionless pin that makes contact with the beam at  $s = s_p$ . The deflection of the beam is completely characterized by the function  $\theta(s)$ , to be determined.

Consider a finite segment of the beam, between the origin and  $s$  (Fig. A1). The equations describing force and rotational equilibrium on this segment are respectively

$$N_0 = N(s) \cos(\theta(s)) + F(s) \sin(\theta(s)) \quad (\text{A1})$$

$$F_0 = F(s) \cos(\theta(s)) - N(s) \sin(\theta(s)) \quad (\text{A2})$$

$$M(s) = M_0 - xF_0 - yN_0 \quad (\text{A3})$$

where  $N(s)$  is the force tangent to the beam at  $s$ ,  $F(s)$  is the shear force,  $M(s)$  is the bending moment (calculated about the point  $s$ ), and the subscript 0 indicates values at the origin. It is helpful to solve Eqns. (A1) and (A2) for  $N$  and  $F$

$$N(s) = N_0 \cos(\theta(s)) - F_0 \sin(\theta(s)) \quad (\text{A4})$$

$$F(s) = F_0 \cos(\theta(s)) + N_0 \sin(\theta(s)) \quad (\text{A5})$$

The coordinates  $x$  and  $y$  can be expressed as integrals of  $\theta(s)$  via

$$\begin{aligned}
x(s) &= \int_0^s ds' \cos(\theta(s')) \\
y(s) &= \int_0^s ds' \sin(\theta(s'))
\end{aligned} \tag{A6}$$

Assuming the pin is frictionless, it can apply a shear force at the contact point, but no tangential force or bending moment. Thus, at the pin ( $s=s_p$ ), we have the boundary conditions

$$N_p = 0 = N_0 \cos(\theta_p) - F_0 \sin(\theta_p) \tag{A7}$$

$$F_p = F_0 \cos(\theta_p) + N_0 \sin(\theta_p) \tag{A8}$$

$$M_p = 0 = M_0 - x_p F_0 - y_p N_0 \tag{A9}$$

The shear force applied by the pin,  $F_p$  is unknown, and is solved for as part of a nonlinear eigenvalue problem.

Lastly, we have the relationship between curvature and moment

$$\frac{d\theta}{ds} = \frac{M(s)}{EI} \tag{A10}$$

where  $E$  is the Young's modulus and  $I$  is the area moment of inertia. For a beam with circular cross section of radius  $R$ ,  $I = \pi R^4/4$ .

Rewriting Eqn. (A7) gives  $N_0 = F_0 \tan(\theta_p)$ . Then, using (A8) and (A9) to eliminate  $F_0$  and  $M_0$  in favor of  $F_p$ , and substituting into (A3) gives

$$M(s) = F_p \{ [x_p - x(s)] \cos(\theta_p) + [y_p - y(s)] \sin(\theta_p) \} \tag{A11}$$

substituting into Eqn. (A10) gives, at last

$$\frac{d\theta}{ds} = \frac{4}{\pi} \frac{F_p}{E R^4} \{ [x_p - x(s)] \cos(\theta_p) + [y_p - y(s)] \sin(\theta_p) \} \tag{A12}$$

Eqns. (A6) and (A12) constitute the set of equations to be solved numerically for  $\theta(s)$ , subject to the starting boundary condition  $\theta(0)=0$ . For an untapered beam,  $R$  is

independent of  $s$ . For a tapered beam,  $R(s) = R_B(1 - \gamma(s/L))$ , where  $\gamma = 1 - (R_T/R_B)$ ,  $R_B$  is the radius at the base of the beam,  $R_T$  is the radius at the tip of the beam and, and  $L$  is the total length of the beam.

From the deflection experiments, we know that the untapered beam maintains  $\theta < 90^\circ$  as the pin is dragged past. Thus, for a given  $x$  value for the pin (see Fig. 2), the largest  $y$  value will occur when the far end of the beam is exactly at the pin (i.e. when  $s_P = L$ ).

Eqns. (A6) and (A12) for a frictionless beam can be simplified by expressing them in terms of the dimensionless variables  $u = x/L$ ,  $v = y/L$  and  $w = s/L$

$$\begin{aligned} u(w) &= \int_0^w dw' \cos(\theta(w')) \\ v(w) &= \int_0^w dw' \sin(\theta(w')) \\ \frac{d\theta}{dw} &= \frac{A}{(1 - \alpha w)^4} \{ [u_P - u(w)] \cos(\theta_P) + [v_P - v(w)] \sin(\theta_P) \} \end{aligned} \quad (\text{A13})$$

where  $A = 4F_P L^2 / (\pi E R_B^4)$  is the dimensionless shear force at the pin. For a given taper, characterized by  $\alpha$ , this presents a nonlinear eigenvalue problem for the set of four parameters ( $A$ ,  $u_P$ ,  $v_P$ ,  $\theta_P$ ).

We solve the set of Eqns. (A13) for the untapered case ( $\gamma = 0$ ), using standard shooting methods [4]. For a given choice of  $A$ , there is a unique set ( $u_P$ ,  $v_P$ ,  $\theta_P$ ) that satisfies the boundary condition with the pin at the tip of the beam,  $w_P = 1$ . Having solved this problem for a range of  $A$  values, we express the maximum scaled deflection  $v_{P,\max}$  directly in terms of the scaled contact distance  $u_P$ . In Fig. 2 we plot the maximum

deflection angle  $\theta_{\max} = \text{atan}(v_{p,\max}/u_p)$  vs.  $u_p$ . In Fig. 3 we plot  $\theta_{\max}$  vs. the scaled distance to the pin,  $[(u_p)^2 + (v_{p,\max})^2]^{1/2}$ .

Other choices for  $\gamma$ , not solved in this paper, will give different solutions for the eigenvalue problem. Thus, the maximum deflection and protraction angles, plotted as a function of scaled contact distance, depend on the taper through  $\gamma$ , and on friction with the pin, but are otherwise independent of  $E$ ,  $R_B$ , and  $L$ .

## References

1. Landau, L.D., and Lifshitz, E.M. (1986). Theory of Elasticity, 3rd ed., (Boston: Butterworth Heinemann).
2. Barber, D.J., and Loudon, R. (1989). An introduction to the properties of condensed matter, (Cambridge: Cambridge University Press).
3. Birdwell, J.A., Solomon, J.H., Thajchayapong, M., Taylor, M.A., Cheely, M., et al. (2007). Biomechanical Models for Radial Distance Determination by the Rat Vibrissal System. *Journal of Neurophysiology* 98, 2439-2455.
4. Press, W.H., Flannery, B.P., Teukolsky, S.A., and Vetterling, W.T. (1989). Numerical Recipes, (New York: Cambridge University Press).

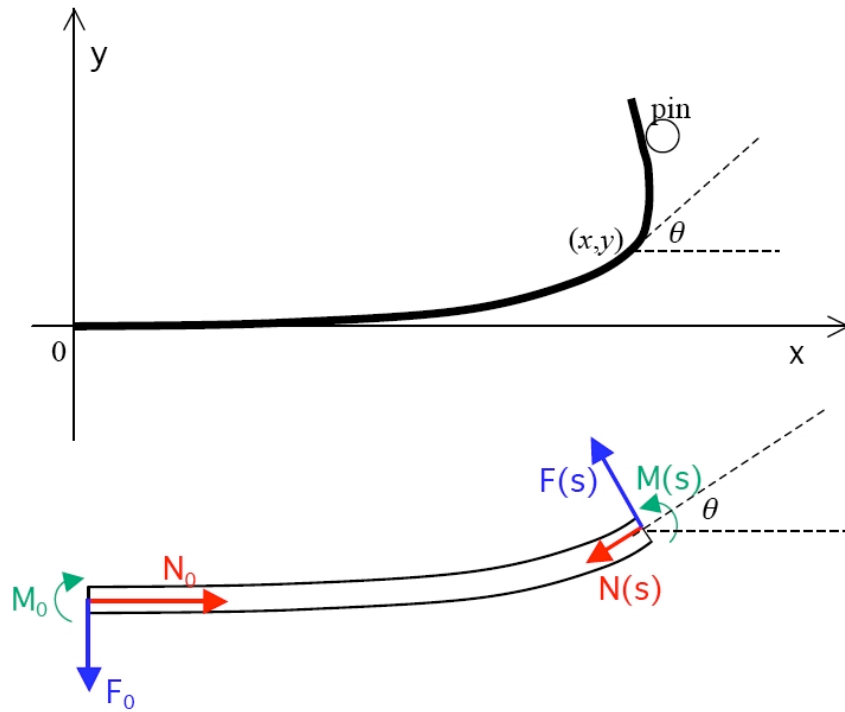

**Figure A1. Elastic beam.** Top: coordinates used in the calculation.  $\theta$  is the angle between the beam tangent vector and the  $x$ -axis. Bottom: A segment of the beam, between the origin and  $s$ , showing the forces and moments applied to the ends. Red: normal forces. Blue: shear forces. Green: bending moments. Note that the bending moment at  $s$  is defined to be positive if it produces an upward curvature.
